# Supplementary material for: A novel reaction of dimethylsulfonium methylide with Michael acceptors: application to the synthesis of difficultly accessible vinyl silanes and styrenesElectronic supporting information (ESI) available: general experimental. See http://www.rsc.org/suppdata/cc/b2/b211279e/
Source: Royal Society of Chemistry journal article supplement (doi:10.1039/b211279e), 2003-02-07
Supplement: b211279e.doc [file b211279e.doc]

# ELECTRONIC SUPPLEMENTARY INFORMATION

A novel reaction of dimethylsulfonium methylide with Michael acceptors: application to the synthesis of difficultly accessible vinyl silanes and styrenes

**Sunil K. Ghosh,* Rekha Singh and Sonali M. Date**

*Bio-Organic Division, Bhabha Atomic Research Centre, Trombay, Mumbai 400 085, INDIA*

*E-mail:* [ghsunil@magnum.barc.ernet.in](mailto:ghsunil@magnum.barc.ernet.in)

### General Experimental

All reactions were performed in oven-dried (120 oC) or flame-dried glass apparatus under dry N2 or argon atmosphere. The solvents were dried and distilled from the indicated drying agents: CH2Cl2 and CHCl3 from P2O5; THF and Et2O from sodium/benzophenone; toluene, benzene and hexanes from sodium; DMSO from CaH2 and then stored over Ca metal. Benzyl and allyl bromides were freshly distilled before use. Methyl iodide and ethyl bromide were dried over MS 4Ao. Benzaldehyde and *p*-anisaldehyde were freshly distilled before use while *p*-bromobenzaldehyde and *p*-nitrobenzaldehyde were crystallised before use. Diethyl malonate, ethyl cyanoacetate, triethyl phosphonoacetate were distilled under vacuum before use. NaH (55% in oil) was obtained from Aldrich while KH (20% in oil suspension) was obtained from Fluka. Diethyl ethoxymethylenemalonate was obtained from Spectrochem (India) and ethyl ethoxymethylenecyanoacetate was prepared following the literature1 procedure. Compounds **2b**-**2e** and **2g** were prepared by standard Knoevenagel condensation between different aromatic aldehydes and diethyl malonate or ethyl cyanoacetate. Compound **2h** was prepared following the literature procedure.2

1H NMR and 13C NMR spectra were recorded on a Bruker 200 MHz spectrometer. Spectra were referenced to residual chloroform ( 7.26 ppm, 1H; 77.00 ppm, 13C). Chemical shifts are reported in ppm (); multiplicities are indicated by s (singlet), d (doublet), t (triplet), q (quartet), quint (pentet), m (multiplet) and br (broad). Coupling constants, *J*, are reported in Hertz. Mass spectra were recorded on a Fissons VG Quatro II mass spectrometer (EI 70 V; CI 30 V). GC-MS were performed on a HP GCD G1800A mass spectrometer fitted with a column HP5 (30 m, 0.25 mm diameter) (temp program 150 oC-4 oC-250 oC). Infrared spectra (IR) were recorded on a Nicolet Impact 410 FT IR spectrophotometer in NaCl cells or in KBr discs. Peaks are reported in cm-1. Melting points (mp) were determined on a Fischer John’s melting point apparatus and are uncorrected. Analytical thin-layer chromatography was performed using home made Acme silica gel plates (about 0.5 mm).

**Ethyl 2-ethoxycarbonyl-3-dimethyl(phenyl)silyl-2-propenoate (2a).**

Dimethyl(phenyl)silyllithium3 (0.85M solution in THF) (105 cm3, 89 mmol) was added dropwise to a stirred solution of diethyl ethoxymethylenemalonate (18 cm3, 89 mmol) in THF (200 cm3) at –78 oC over 0.5h. After the addition was over, the reaction mixture was stirred for 5 min and the cold bath was removed. The reaction mixture was allowed to attain to room temperature (about 25 min) and poured into saturated ammonium chloride solution, extracted with Et2O. The organic extract was washed with water and with brine, dried (MgSO4) and evaporated. The residue was chromatographed (SiO2, hexane/EtOAc: 95/5) to give the diester **2a**4 (19.9 g, 73%) as a colorless oil; *R*f 0.6 (hexane:EtOAc; 95:5); *n*max(neat)/cm-1 1731 (C=O), 1600 (C=C), 1237 (SiMe), 1115 (SiPh); *d*H(200 MHz, CDCl3) 0.45 (6 H, s, 2 X SiMe), 1.19 (3 H, t, *J* 7.1 Hz, *Me*CH2OCO), 1.29 (3 H, t, *J* 7.1 Hz, *Me*CH2OCO), 4.00 (2 H, q, *J* 7.1 Hz, MeC*H2*OCO), 4.24 (2 H, q, *J* 7.1 Hz, MeC*H2*OCO), 7.32 (1 H, s, C=CHSi), 7.34-7.38 (3 H, m, Ph), 7.50-7.55 (2 H, m, Ph); *d*C(50 MHz, CDCl3) 165.94, 163.57, 147.38, 141.52, 136.12, 133.75, 129.33, 127.74, 61.42, 61.08, 13.91, 13.69, -2.75; m/z (ESI) 329 (M+Na, 15), 307 (M+H, 5), 229 (M-Ph, 100), 128 (82), 173 (41), 155 (37).

**Ethyl 2-cyano-3-dimethyl(phenyl)silyl-2-propenoate (2f).**

A solution of ethyl ethoxymethylenecyanoactate (5.6 gm, 33.3 mmol) in THF (100 cm3) was added to a stirred solution of dimethyl(phenyl)silyllithium3 (0.95 M solution in THF) (35 cm3, 33.4 mmol) dropwise at –78 oC. After the addition was over, the reaction mixture was stirred for 15 min and the cold bath was removed. The reaction mixture was allowed to attain to room temperature (about 25 min) and poured into a saturated ammonium chloride solution, extracted with Et2O. The organic extract was washed with water and with brine, dried (anhy. MgSO4) and evaporated. The residue was chromatographed (SiO2, hexane/EtOAc: 95/5) to give the cyanoester **2f** (0.9 g, 24%) as a colorless oil; *Rf* 0.57 (hexane/EtOAc, 95:5); *n*max(neat)/cm-1 3070 (HC=C), 2227 (CN), 1732 (CO), 1587 (C=C), 1234 (SiMe), 1115 (SiAr); *d*H(200 MHz, CDCl3) 0.64 (s, 6 H, 2 X SiMe), 1.36 (t, *J* = 7.1 Hz, 3 H, *Me*CH2OCO), 4.32 (q, *J* = 7.1 Hz, 2 H, MeC*H2*OCO), 7.40-7.60 (m, 5 H, Ar), 8.07 (s, 1 H, C=CHSi); *d*C(50 MHz, CDCl3) -3.47, 14.01, 62.77, 115.30, 120.74, 128.24, 130.14, 133.84, 134.42, 160.88, 163.74); m/z (EI) 259 (M+, 4), 258 (M-H, 10), 244 (M-Me, 14), 230 (M-Et, 73), 216 (74), 188 (41.5), 186 (M-CO2Et, 50), 145 (60.4), 137 (45.5), 135 (PhMe2Si, 65.3), 105 (100), 103 (65.3), 91 (32.7), 75 (94).

**1,1-Diethoxycarbonyl-2-dimethyl(phenyl)silylcyclopropane (4a).**

A solution of sodium dimsylate (1.5 mmol, 1.5 eq.) in DMSO (6 cm3) was prepared. The solution was diluted with THF (1 cm3) and cooled on an bath (0 oC). Solid trimethylsulfonium iodide (245 mg, 1.2 mmol, 1.2 eq.) was introduced into the flask and the reaction mixture was stirred under same conditions for 15 min. A solution of the 2-silyl alkyledene malonate **2a** (0.306 gm, 1 mmol, 1 eq) in dry THF (1.5 cm3) was rapidly added to the reaction mixture. It was slowly brought to room temperature (about 1 h) and stirred for 1 h. The reaction mixture was diluted with water and extracted with ether. The organic extract was washed with brine, dried (MgSO4) and evaporated. The residue was chromatographed (SiO2, hexane/EA = 95 /5) to give the cyclopropane **4a** (126 mg, 40 %). This product was contaminated with about 2% of vinyl silane **5a** as judged by GC analysis. *Rf* 0.32 (hexane/EtOAc, 95:5); *n*max (neat)/cm-1 1731 (C=O), 1249 (SiMe), 1116 (SiPh); *d*H (200 MHz, CDCl3) 0.25 (s, 3 H, SiMe), 0.34 (s, 3 H, SiMe), 1.10 (dd, *J* = 9.5, 11 Hz, 1 H), 1.18 (t, *J* = 7.1 Hz, 3 H, *Me*CH2OCO), 1.26 (t, *J* = 7 Hz, 3 H, *Me*CH2OCO), 1.41 (dd, *J* = 3.4, 9.5 Hz, 1 H), 1.52 (dd, *J* = 3.4, 11 Hz, 1 H), 3.80-4.30 (m, 4 H, 2 X MeC*H2*OCO), 7.30-7.75 (m, 5 H, Ar); *d*C(50 MHz, CDCl3) -3.32, -3.16, 13.80, 14.00, 15.35, 18.38, 33.31, 61.16, 61.56, 127.71, 129.12, 133.78, 137.86, 169.07, 170.98; m/z (EI) 305 (M-Me, 100), 275 (M-OEt, 11.1), 243 (M-Ph, 70.3), 231 (90), 215 (21.3), 187 (76), 169 (73), 159 (27), 135 (PhMe2Si, 40.7), 105 (28.7) (Found: C, 63.36; H, 7.88%. C17H24O4Si requires C, 63.72; H, 7.55%).

**Ethyl 3-dimethyl(phenyl)silyl-2-ethoxycarbonyl-3-butenoate (5a).**

A solution of sodium dimsylate (2.5 mmol, 2.5 eq.) in DMSO (2.5 cm3) was prepared. The solution was diluted with THF (4 cm3) and cooled on an ice-salt bath (0 oC). Solid trimethylsulfonium iodide (245 mg, 1.2 mmol, 1.2 eq.) was introduced into the flask and the reaction mixture was stirred under same conditions for 15 min. A solution of the 2-silyl alkyledene malonate **2a** (0.306 gm, 1 mmol, 1 eq) in dry THF (2 cm3) was rapidly added to the reaction mixture. It was slowly brought to room temperature (about 1 h) and stirred for 1 h. The reaction mixture was diluted with water and extracted with ether. The organic extract was washed with brine, dried (MgSO4) and evaporated. The residue was chromatographed (SiO2, hexane/EA = 95 /5) to give the vinyl silane **5a** (210 mg, 66 %). *Rf* 0.30 (hexane/EtOAc, 95:5); *d*H(200 MHz, CDCl3) 0.41 (s, 6 H, 2 X SiMe), 1.20 (t, *J* = 7.1 Hz, 6 H, 2 X *Me*CH2OCO), 4.10 (q, *J* = 7.1 Hz, 4 H, 2 X Me*CH2*OCO), 4.14 (s, br, 1 H, *H*C(CO2Et)2), 5.76 (d, *J* = 1.4 Hz, 1 H, SiC=CH), 6.03 (t, br, *J* = 1.1 Hz, 1 H, SiC=CH), 7.32-7.55 (m, 5 H, Ar); *d*C(50 MHz, CDCl3) -2.81, 13.79, 56.82, 61.24, 127.59, 129.06, 132.21, 133.97, 136.99, 141.83, 168.10; *n*max(neat)/cm-1 1732 (C=O), 1250 (SiMe), 1112 (SiPh); m/z (EI) 305 (M-Me, 99), 275 (M-OEt, 9.2), 247 (M-CO2Et, 16.6), 243 (M-Ph, 100), 231 (40.7), 215 (21.3), 187 (58.3), 169 (40.7), 161 (42.6), 159 (22.2), 137 (47.2), 135 (PhMe2Si, 88), 125 (36), 105 (78.7) (Found: C, 63.44; H, 7.90%. C17H24O4Si requires C, 63.72; H, 7.55%).

**Ethyl 3-dimethyl(phenyl)silyl-2-ethoxycarbonyl-2-methyl-3-butenoate (5b).**

A solution of sodium dimsylate (7.5 mmol, 2.5 eq.) in DMSO (7.5 cm3) was prepared. The solution was diluted with THF (9 cm3) and cooled on an ice-salt bath (-8 oC). Solid trimethylsulfonium iodide (735 mg, 3.6 mmol, 1.2 equiv.) was introduced into the flask and the reaction mixture was stirred under same conditions for 15 min. A solution of the 2-silyl alkyledene malonate **2a** (0.92 gm, 3 mmol, 1 eq) in dry THF (9 cm3) was rapidly added to the reaction mixture. It was slowly brought to room temperature (about 2.5 h) and stirred for 45 min. The reaction mixture was cooled on an ice-water bath and MeI (0.94 cm3, 15 mmol, 5 eq.) was added. After 14 h at room temperature, the reaction mixture was diluted with water and extracted with ether. The organic extract was washed with brine, dried (MgSO4) and evaporated. The residue was chromatographed (SiO2, hexane/EA = 95 /5) to give the vinyl silane **5b** (800 mg, 80 %). *Rf* 0.46 (hexane/EtOAc, 95:5); *d*H(200 MHz, CDCl3) 0.42 (s, 6 H, 2 X SiMe), 1.22 (t, *J* = 7.1 Hz, 6 H, 2 X *Me*CH2OCO), 1.59 (s, 3 H, *Me*C(CO2Et)2), 4.04-4.25 (m, 4 H, 2 X Me*CH2*OCO), 5.61 (s, 1 H, SiC=CH), 5.82 (s, 1 H, SiC=CH), 7.31-7.58 (m, 5 H, Ar); *d*C(50 MHz, CDCl3) -0.59, 13.76, 21.84, 59.92, 61.20, 127.41, 128.61, 129.07, 133.87, 139.29, 148.50, 171.41; *n*max(neat)/cm-1 1731 (C=O), 1259 (SiMe), 1110 (SiPh); m/z (EI) 319 (M-Me, 100), 289 (M-OEt, 7.3), 262 (27.5), 261 (M-CO2Et, 26.6), 257 (M-Ph, 92.6), 245 (39.5), 229 (9.2), 201 (18.3), 173 (38.5), 169 (8.2), 135 (PhMe2Si, 47.7), 111 (20.2), 105 (29.3) (Found: C, 64.21; H, 8.10%. C18H26O4Si requires C, 64.63; H, 7.84%).

**Ethyl 3-dimethyl(phenyl)silyl-2-ethoxycarbonyl-2-ethyl-3-butenoate (5c).**

Procedure as described for the preparation of **5b**.*Rf* 0.48 (hexane/EtOAc, 95:5); *d*H(200 MHz, CDCl3) 0.43 (s, 6 H, 2 X SiMe), 0.89 (t, *J* = 7.4 Hz, 3 H, *Me*CH2), 1.20 (t, *J* = 7.1 Hz, 6 H, 2 X *Me*CH2OCO), 2.10 (q, *J* = 7.4 Hz, 2 H, Me*CH2*), 4.11 (q, *J* = 7.1 Hz, 2 H, Me*CH2*OCO), 4.12 (q, *J* = 7.1 Hz, 2 H, Me*CH2*OCO), 5.67 (s, 1 H, SiC=CH), 5.91 (s, 1 H, SiC=CH), 7.30-7.58 (m, 5 H, Ar); *d*C(50 MHz, CDCl3) -0.32, 9.44, 13.92, 28.57, 61.07, 63.72, 127.42, 128.53, 130.80, 134.02, 140.09, 147.52, 171.00; *n*max(neat)/cm-1 1731 (C=O), 1244 (SiMe), 1110 (SiPh); m/z (EI) 333 (M-Me, 33), 303 (M-OEt, 5), 275 (M-CO2Et, 15.6), 271 (59), 259 (M-Ph, 13.3), 233 (12.2), 215 (32.2), 187 (42.2), 159 (86.6), 153 (47.8), 135 (PhMe2Si, 100), 141 (33.3), 125 (46.6), 121 (22.2), 107 (20), 105 (71), 95 (37.8), 91 (30), 77 (33.3), 75 (73.3).

**2-Dimethyl(phenyl)silyl-3,3-diethoxycarbonyl-1,5-hexadiene (5d).**

Procedure as described for the preparation of **5b** except 1.5 equiv of allyl bromide was used.*Rf* 0.32 (hexane/EtOAc, 98:2); *d*H(200 MHz, CDCl3) 0.42 (s, 6 H, 2 X SiMe), 1.19 (t, *J* = 7.1 Hz, 6 H, 2 X *Me*CH2OCO), 2.82 (d, *J* = 7.1 Hz, 2 H, CH2=CH*CH2*), 3.97-4.19 (m, 4 H, 2 X Me*CH2*OCO), 5.00 (s, 1 H, C*HA*HB=CHCH2), 5.06 (d, *J* = 5 Hz, 1 H, CHA*HB*=CHCH2), 5.68 (s, 1 H, SiC=CH), 5.68-5.94 (m, 1 H, CHAHB=*CH*CH2), 5.94 (s, 1 H, SiC=CH), 7.30-7.57 (m, 5 H, Ar); *d*H(50 MHz, CDCl3) -0.32, 13.92, 40.12, 61.24, 63.36, 117.99, 127.46, 128.60, 131.04, 133.83, 134.05, 139.92, 147.46, 170.52; *n*max(neat)/cm-1 1731, 1245, 1111; m/z (EI) 345 (M-Me, 100), 319 (M-allyl, 5.5), 287 (M-CO2Et, 10.1), 285 (11.1), 283 (M-Ph, 82.4), 271 (28.7), 244 (8.3), 227 (12.9), 209 (27.8), 199 (21.3), 165 (13.8), 135 (PhMe2Si, 60.2), 121 (22.2), 105 (26.9) (Found: C, 66.71; H, 8.11%. C20H28O4Si requires C, 66.63; H, 7.83%).

**Ethyl 3-dimethyl(phenyl)silyl-2-ethoxycarbonyl-2-benzyl-3-butenoate (5e).**

Procedure as described for the preparation of **5b** except 2.5 equiv of benzyl bromide was used *Rf* 0.37 (hexane/EtOAc, 98:2); *d*H(200 MHz, CDCl3) 0.23 (s, 6 H, 2 X SiMe), 1.11 (t, *J* = 7.1 Hz, 6 H, 2 X *Me*CH2OCO), 3.43 (s, 2 H, Ph*CH2*), 4.03 (q, *J* = 7.1 Hz, 4 H, 2 X Me*CH2*OCO), 5.73 (s, 1 H, SiC=CH), 6.06 (s, 1 H, SiC=CH), 7.10-7.50 (m, 10 H, Ar); *d*C(50 MHz, CDCl3) -0.60, 13.74, 42.55, 61.24, 64.76, 126.76, 127.34, 127.87, 128.35, 130.73, 132.02, 134.03, 136.56, 140.53, 148.48, 170.49; *n*max(neat)/cm-1 1732 (C=O), 1248 (SiMe), 1111 (SiPh); m/z (EI) 395 (M-Me, 0.5), 333 (M-Ph, 24.4), 215 (31.1), 199 (20), 158 (15.5), 137 (28.9), 135 (PhMe2Si, 57.8), 129 (20), 128 (15.6), 105 (35.5), 91 (PhCH2, 100), 77 (13.3), 75 (22.2).

**Ethyl 2-ethoxycarbonyl-2-methyl-3-phenyl-3-butenoate (5f).**

Procedure as described for the preparation of **5b**.*Rf* 0.40 (hexane/EtOAc, 95:5); *d*H(200 MHz, CDCl3) ** 1.20 (t, *J* = 7.1 Hz, 6 H, 2 X *Me*CH2OCO), 1.60 (s, 3 H, *Me*C(CO2Et)2), 4.18 (q, *J* = 7.1 Hz, 4 H, 2 X Me*CH2*OCO), 5.34 (s, 2 H. ArC=*CH2*), 7.36 (s, br, 5 H, Ar); *d*C(50 MHz, CDCl3) ** 13.82, 22.26, 60.03, 61.59, 118.03, 127.34, 127.82, 128.24, 140.76, 147.78, 171.33. *n*max(neat)/cm-1 1728 (C=O); m/z (EI) 276 (M+, 0.5), 231 (M-OEt, 0.5), 203 (M-CO2Et 100), 185 (11), 175 (89), 147 (15.6), 129 (64.4), 115 (33.3), 91 (26.6).

**Ethyl 2-ethoxycarbonyl-2-methyl-3-(4-methoxyphenyl)-3-butenoate (5g).**

Procedure as described for the preparation of **5b**.*Rf* 0.24 (hexane/EtOAc, 95:5); *d*H(200 MHz, CDCl3) 1.20 (t, *J* = 7.1 Hz, 6 H, 2 X *Me*CH2OCO), 1.58 (s, 3 H, *Me*C(CO2Et)2), 3.77 (s, 3 H, *Me*OAr), 4.17 (q, *J* = 7.1 Hz, 4 H, 2 X Me*CH2*OCO), 5.26 (s, 1 H, ArC=C*H*), 5.29 (s, 1 H, ArC=C*H*), 6.79 (d, *J* = 8.6 Hz, 2 H, Ar), 7.18 (d, *J* = 8.6 Hz, 2 H, Ar); *d*C(50 MHz, CDCl3) 13.79, 22.15, 55.09, 60.09, 61.50, 113.10, 117.24, 129.35, 133.03, 147.26, 158.84, 171.35; *n*max(neat)/cm-1 1731 (C=O), 1609 (C=C); m/z (EI) 307 (M+H, 2.5), 306 (M+, 2.5), 261 (M-OEt, 1.9), 233 (M-CO2Et, 100), 205 (M-CO2Et-C2H4, 79.5), 187 (10.7), 177 (25.2), 159 (45.5), 145 (17), 115 (20.8), 91 (19.6) (Found: C, 66.22; H, 7.41%. C17H22O5 requires C, 66.65; H, 7.24%).

**Ethyl 2-ethoxycarbonyl-2-methyl-3-(4-bromophenyl)-3-butenoate (5h).**

Procedure as described for the preparation of **5b**.*Rf* 0.40 (hexane/EtOAc, 95:5); *d*H(200 MHz, CDCl3) 1.21 (t, *J* = 7.1 Hz, 6 H, 2 X *Me*CH2OCO), 1.59 (s, 3 H, *Me*C(CO2Et)2), 4.17 (q, *J* = 7.1 Hz, 4 H, 2 X Me*CH2*OCO), 5.33 (s, 1 H, ArC=C*H*), 5.36 (s, 1 H, ArC=C*H*), 7.16 (d, *J* = 8.4 Hz, 2 H, Ar), 7.40 (d, *J* = 8.4 Hz, 2 H, Ar); *d*C(50 MHz, CDCl3) 13.84, 22.21, 59.85, 61.71, 118.65, 121.52, 130.05, 130.94, 139.77, 146.79, 171.11; *n*max(neat)/cm-1 1732 (C=O); m/z (EI) 356 (C16H19O481Br, M+, 0.2), 354 (C16H19O479Br, M+, 0.25), 311 (C16H19O481Br-OEt, 0.5), 309 (C16H19O479Br-OEt, 0.6), 283 (C16H19O481Br-CO2Et, 75.6), 281 (C16H19O479Br-CO2Et, 77.8), 255 (66.7), 253 (68.9), 227 (7.8), 225 (7.8), 207 (11.1), 207 (12.2), 146 (15.5), 130 (42.2), 129 (44.4), 128 (100), 127 (41.1), 115 (30), 102 (26.6) (Found: C, 53.88; H, 5.45%. C16H19BrO4 requires C, 54.10; H, 5.39%).

**Ethyl 2-ethoxycarbonyl-2-methyl-3-(4-nitrophenyl)-3-butenoate (5i).**

Procedure as described for the preparation of **5b**.*Rf* 0.36 (hexane/EtOAc, 90:10); *d*H(200 MHz, CDCl3) 1.20 (t, *J* = 7.1 Hz, 6 H, 2 X *Me*CH2OCO), 1.65 (s, 3 H, *Me*C(CO2Et)2), 4.17 (q, *J* = 7.1 Hz, 4 H, 2 X Me*CH2*OCO), 5.43 (s, 1 H, ArC=C*H*), 5.51 (s, 1 H, ArC=C*H*), 7.48 (d, *J* = 8.6 Hz, 2 H, Ar), 8.15 (d, *J* = 8.6 Hz, 2 H, Ar); *d*C(50 MHz, CDCl3) 13.74, 22.22, 59.57, 61.80, 120.19, 122.97, 129.20, 146.22, 147.01, 147.75, 170.67; *n*max(neat)/cm-1 1728 (C=O), 1598 (C=C), 1521 (NO2); m/z (EI) 276 (M-OEt, 0.5), 246 (M-CO2Et, 80), 220 (M-CO2Et-C2H4, 100), 174 (19), 129 (25.6), 128 (41.1), 115 (17.8) (Found: C, 60.06; H, 6.00; N, 4.11%. C16H19NO6 requires C, 59.81; H, 5.96; N, 4.36%).

**Ethyl 2-cyano-3-dimethyl(phenyl)silyl-2-methyl-3-butenoate (5j).**

Procedure as described for the preparation of **5b**.*Rf* 0.42 (hexane/EtOAc, 98:2); *d*H(200 MHz, CDCl3) 0.49 (s, 3 H, SiMe), 0.52 (s, 3 H, SiMe), 1.19 (t, *J* = 7.1 Hz, 3 H, *Me*CH2OCO), 1.65 (s, 3 H, *Me*C(CO2Et)(CN)), 3.77-4.10 (m, 2 H, Me*CH2*OCO), 5.78 (s, 1 H, SiC=CH), 6.24 (s, 1 H, SiC=CH), 7.33-7.55 (m, 5 H, Ar); *d*C(50 MHz, CDCl3) -1.46, -1.37, 13.67, 24.13, 49.36, 62.77, 119.52, 127.79, 129.43, 131.34, 134.04, 136.72, 145.20, 168.01; *n*max(neat)/cm-1 2241 (CN), 1745 (C=O), 1251 (SiMe), 1113 (SiAr); m/z (EI) 272 (M-Me, 29), 244 (13.3), 210 (46.7, M-Ph), 200 (66.7), 173 (84.4), 135 (PhMe2Si, 100), 111 (51.1).

**Ethyl 2-cyano-2-methyl-3-(4-methoxyphenyl)-3-butenoate (5k) and (*Z*)-ethyl** **2-cyano-2-methyl-3-(4-methoxyphenyl)-3-pentenoate (7b).**

Procedure same as described for the preparation of **5b**. Yield 60%; Ratio of **5k**/**7b** = 65/35; The individual components could not be separated from the mixture. Data for **7b**: *d*H(200 MHz, CDCl3) (recognizable peaks) 1.25 (t, *J* = 6.7 Hz, 3 H, *Me*CH2OCO), 1.50 (d, *J* = 6.7 Hz, 3 H, *Me*CH=C), 1.66 (s, 3 H, *Me*C(CO2Et)(CN)), 3.81 (s, 3 H, *Me*OAr), 4.18 (q, *J* = 6.7 Hz, 2 H, Me*CH2*OCO), 6.18 (q, 1 H, *J* = 6.7 Hz, ArC=C*H*).

**Ethyl 2-cyano-2-methyl-3-(4-methoxyphenyl)-3-butenoate (5k).**

A solution of sodium dimsylate (2.5 mmol, 2.5 eq.) in DMSO (2.5 cm3) was prepared. The solution was diluted with THF (3 cm3) and cooled on an ice-salt bath (-8 oC). Solid trimethylsulfonium iodide (245 mg, 1.2 mmol, 1.2 eq.) was introduced into the flask and the reaction mixture was stirred under same conditions for 15 min. A solution of the aryledene cyanoacetate **2g** (0.231 gm, 1 mmol, 1 eq) in dry THF (3 cm3) was rapidly added to the reaction mixture. It was slowly brought to room temperature (about 2.5 h) and stirred for 45 min. The reaction mixture was cooled on an ice-water bath and a warm solution of MgBr2 (920 mg, 5 mmol) in THF (10 cm3) was added into the reaction mixture. After 15 min, MeI (0.5 cm3, 8 mmol, 8 eq.) was added to the above slurry and allowed to attain room temperature. After 14 h at room temperature, the reaction mixture was diluted with water and extracted with ether. The organic extract was washed with brine, dried (MgSO4) and evaporated. The residue was chromatographed (SiO2, hexane/EA = 95 /5) to give the styrene **5k** (44 mg, 17 %). *Rf* 0.37 (hexane/EtOAc, 98:2); *d*H(200 MHz, CDCl3) 1.22 (t, *J* = 7.2 Hz, 3 H, *Me*CH2OCO), 1.79 (s, 3 H, *Me*C(CO2Et)(CN)), 3.81 (s, 3 H, *Me*OAr), 4.21 (q, *J* = 7.2 Hz, 2 H, Me*CH2*OCO), 5.42 (s, 1 H, ArC=CH), 5.63 (s, 1 H, ArC=CH), 6.85 (d, *J* = 8.7 Hz, 2 H, Ar), 7.22 (d, *J* = 8.7 Hz, 2 H, Ar); *d*C(50 MHz, CDCl3) 13.76, 23.19,48.87, 55.24, 63.08, 113.62, 113.62,118.10, 119.41, 129.20, 130.39, 143.92, 159.60, 167.85; *n*max(neat)/cm-1 2240 (CN), 1746 (C=O), 1608 (C=C); m/z (EI) 260 (M+H, 3.8), 259 (M+, 19.6), 244 (M-Me, 3.2), 233 (M-CN, 4.1), 186 (M-CO2Et, 17.4), 172 (10.4), 144 (13.2), 135 (28), 133 (M-C(CN)(Me)CO2Et,100), 121 (27.8), 108 (24), 91 (10), 89 (12), 77 (22) (Found: C, 69.22; H, 6.87; N, 5.12%. C15H17O3N requires C, 69.48; H, 6.61; N, 5.40%).

**Diethyl 2-ethoxycarbonyl-3-(4-methoxyphenyl)-3-buten-2-phosphonate (5l).**

Procedure as described for the preparation of **5b**.*Rf* 0.5 (hexane-EtOAc, 70:30); *d*H(200 MHz, CDCl3) 1.02 (t, *J* = 7.1 Hz, 3 H, *Me*CH2OCO), 1.26 (t, *J* = 6.9 Hz, 3 H, *Me*CH2OP), 1.29 (t, *J* = 6.8 Hz, 3 H, *Me*CH2OP), 1.64 (d, *J* = 15.7 Hz, 3 H, *Me*C(CO2Et)(EtO)2P(O)), 3.74 (s, 3 H, *Me*OAr), 3.85-4.05 (m, 2 H, Me*CH2*OP), 4.05-4.26 (m, 4 H, Me*CH2*OP and Me*CH2*OCO), 5.28 (d, *J* = 4.4 Hz, 1 H, ArC=CH), 5.61 (d, *J* = 4.2 Hz, 1 H, ArC=CH), 6.76 (d, *J* = 8.4 Hz, 2 H, Ar), 7.22 (d, *J* = 8.4 Hz, 2 H, Ar); *d*C(50 MHz, CDCl3) 13.48, 16.25 (d, *J* = 5.5 Hz), 21.63 (d, *J* = 5 Hz), 52.99, 55.02, 55.79, 61.23, 62.89 (d, *J* = 4.3 Hz), 112.80, 119.09 (d, *J* = 8.1 Hz), 129.34, 133.82 (d, *J* = 4.9 Hz), 145.79 (d, *J* = 7 Hz), 158.63, 170.98; *n*max(neat)/cm-1 1731 (C=O), 1608 (C=C), 1247 (P=O), 1028 (P-O); m/z (EI) 370 (M+, 0.1), 325 (M-OEt, 0.5), 297 (M-CO2Et, 16), 233 (M-P(O)(OEt)2, 100), 205 (46.6), 159 (30), 145 (11), 121 (20).

### References

1. R. G. Jones, *J. Am. Chem. Soc.*, 1952, **74**, 4889-4891.
2. J. M. McIntosh and R. A. Sieler, *Can. J. Chem.*, 1978, **56**, 226-231.
3. A. S. Guram, G. A. Kraft, in *Encyclopedia of Reagents for Organic Synthesis*, ed. L. A. Paquette, Wiley, Chichester, **1995**, *3*, 2113.
4. C. E. Tucker and P. Knochel, S*ynthesis*, 1993, 530-536.
